# Supplementary material for: Interdecadal Variation of Spring Extreme High-Temperature Events in the Western Tianshan Mountains and Its Relationship with the Tropical SST
Source: Hindawi journal article supplement (doi:10.1155/2023/3560009), 2023-06-20
Supplement: f1 [file 3560009.f1.pdf]

## Supplementary Material

# Interdecadal Variation of Spring Extreme High Temperature Events in the Western Tianshan Mountains and Its Relationship with the Tropical SST\*

Liyun Ma,<sup>1</sup> Ping Chen,<sup>1</sup> Junqiang Yao,<sup>1</sup> Jinggao Hu,<sup>2</sup> and Weiyi Mao<sup>1</sup>

\* Correspondence: Weiyi Mao; mao6991@vip.sina.com

## 1 Supplementary Figures

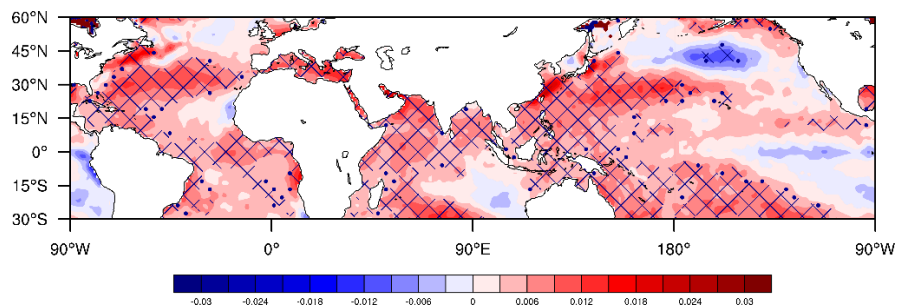

**Supplementary Figure 1.** Regression of SST in spring with regard to Iranian high index from 1979 to 2019 (°C). The dots denote the regression coefficient significant at the 95% confidence level based on the Student's t test

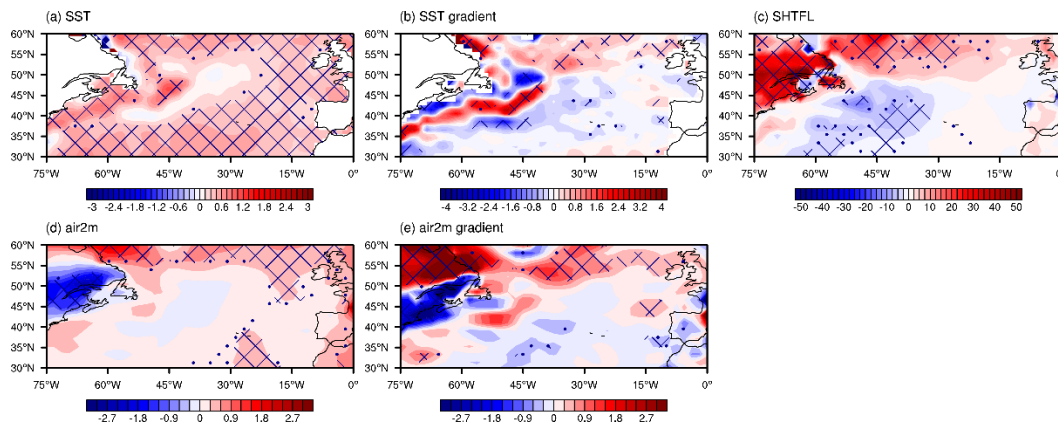

**Supplementary Figure 2.** Difference in the spring average (a) SST (°C), (b) meridional SST gradient ( $10^{-6}$  K m $^{-1}$ ), (c) net surface sensible heat flux and ( $W m^{-2}$ ), (d) surface 2-m air temperature (°C) (e) meridional gradient of surface 2-m air temperature ( $10^{-6}$  K m $^{-1}$ ) between P2 and P1
